# Supplementary material
Source: Springer Nature journal article supplement (https://www.springerprofessional.de/resource/supplementary/40493_2013_5_MOESM9_ESM.pdf/11899616)

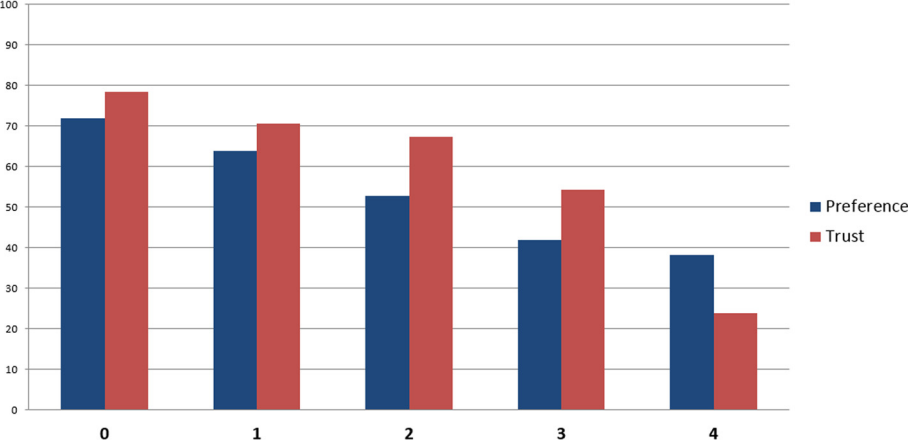

Supplement: MOESM9 [file 11899616]
